# Supplementary material
Source: Springer Nature journal article supplement (https://www.springermedizin.de/resource/supplementary/13089_2010_2_MOESM1_ESM.pdf/9675550)

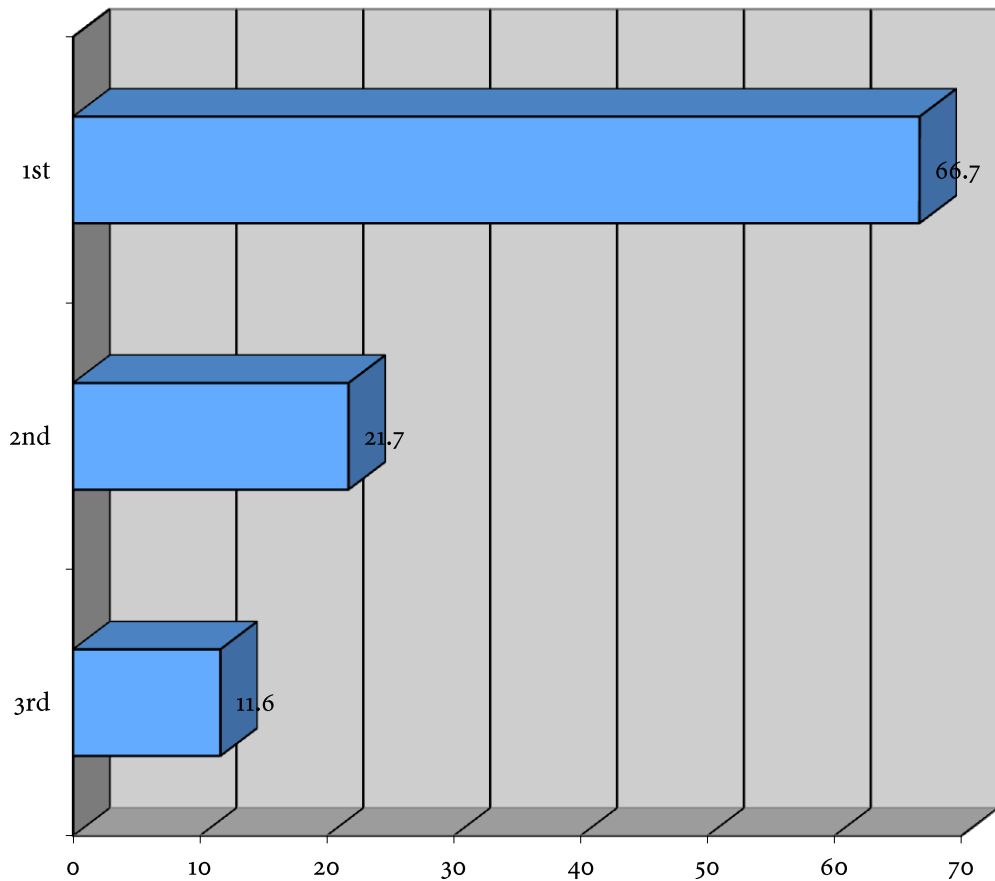

■ Percentage of Cannulation

Supplement: MOESM1 [file 9675550]
